# Supplementary material for: The First Venomous Crustacean Revealed by Transcriptomics and Functional Morphology: Remipede Venom Glands Express a Unique Toxin Cocktail Dominated by Enzymes and a Neurotoxin
Source: PubMed Central journal article supplement — Mol Biol Evol. 2013 Oct 16;31(1):48–58. doi: 10.1093/molbev/mst199 (PMC3879455; doi:10.1093/molbev/mst199), 2013-10-16
Supplement: supp_mst199_13-0605_vonReumont_SupplementaryFile2.pdf [file supp_mst199_13-0605_vonReumont_SupplementaryFile2.pdf]

## Supplementary Material - file 2

**The first venomous crustacean revealed by transcriptomics and functional morphology: remipede venom glands express a unique toxin cocktail dominated by enzymes and a neurotoxin**

### Research Article

**Björn M. von Reumont<sup>\*1</sup>, Alexander Blanke<sup>2</sup>, Sandy Richter<sup>3</sup>, Fernando Alvarez<sup>4</sup>,  
Christoph Bleidorn<sup>3</sup>, Ronald A Jenner<sup>\*1</sup>**

### The supplementary PDF files include:

Supplementary\_file1: Supplementary Text, Supplementary Figures 1-2  
**Supplementary\_file2: Supplementary Figures 3**  
Supplementary\_file3: Supplementary Figures 4-6  
Supplementary\_file4: Supplementary Figures 7-9  
Supplementary\_file5: Supplementary Tables 1 and 2

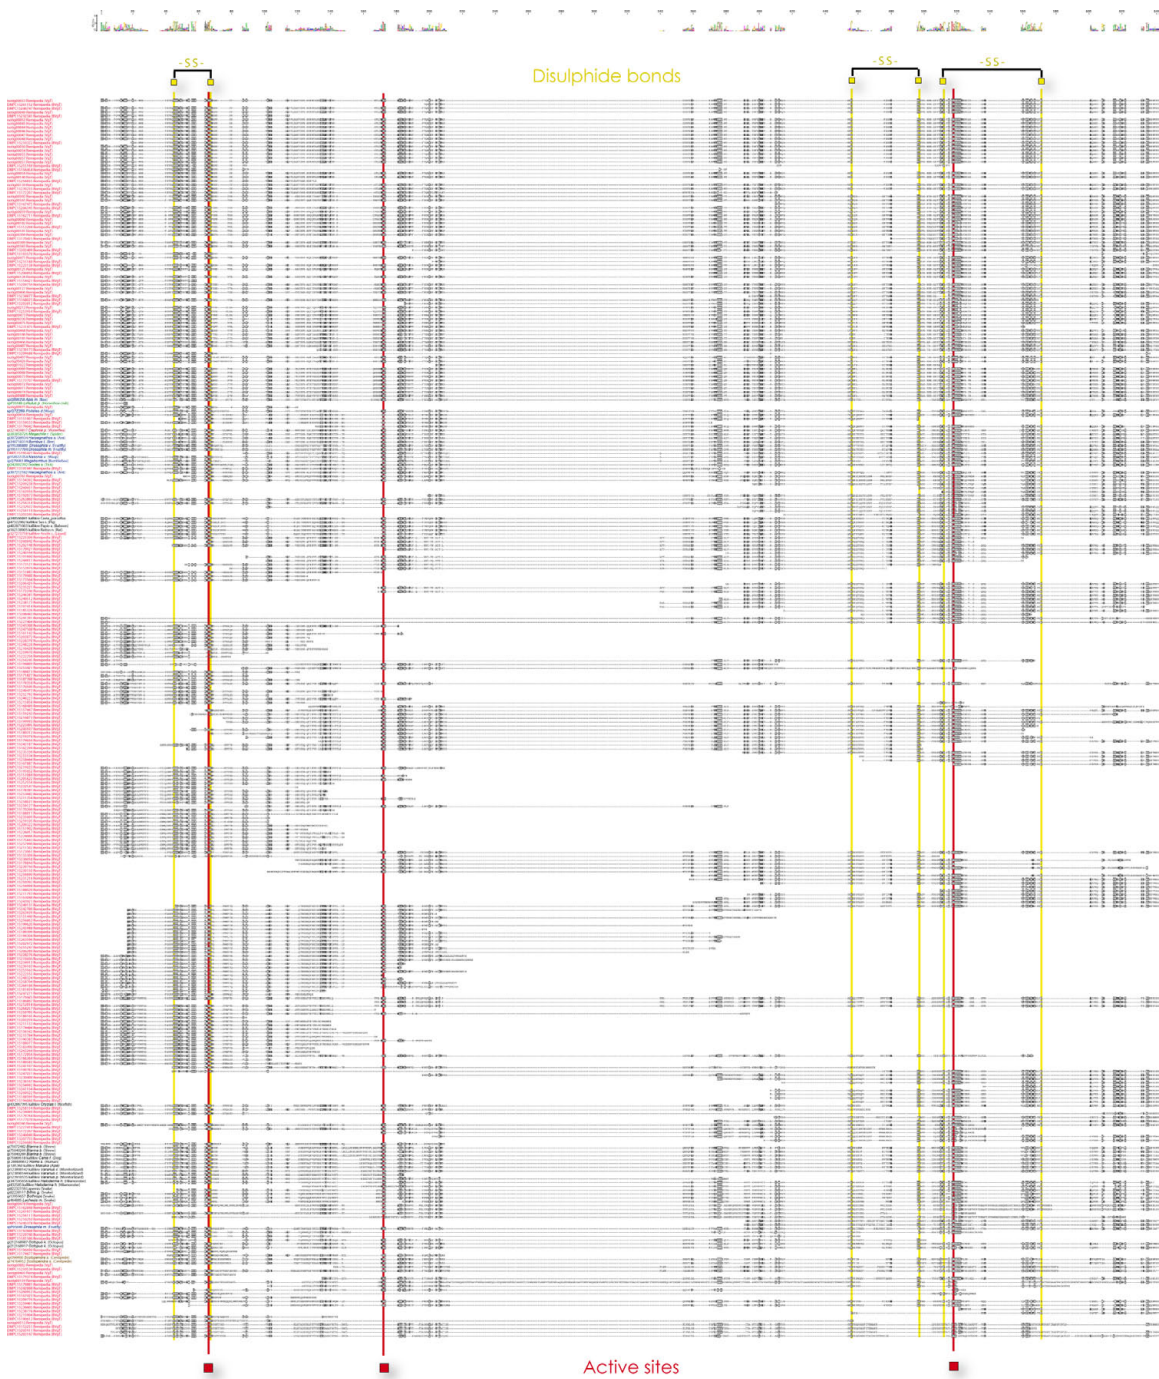

### Supplementary Figure 3a

Alignment of the peptidase S1 domain. The positions of the catalytic triad are highlighted by red squares and lines that mark the three active sites. Disulphide bonds and taxa are colour coded as in previous figures.

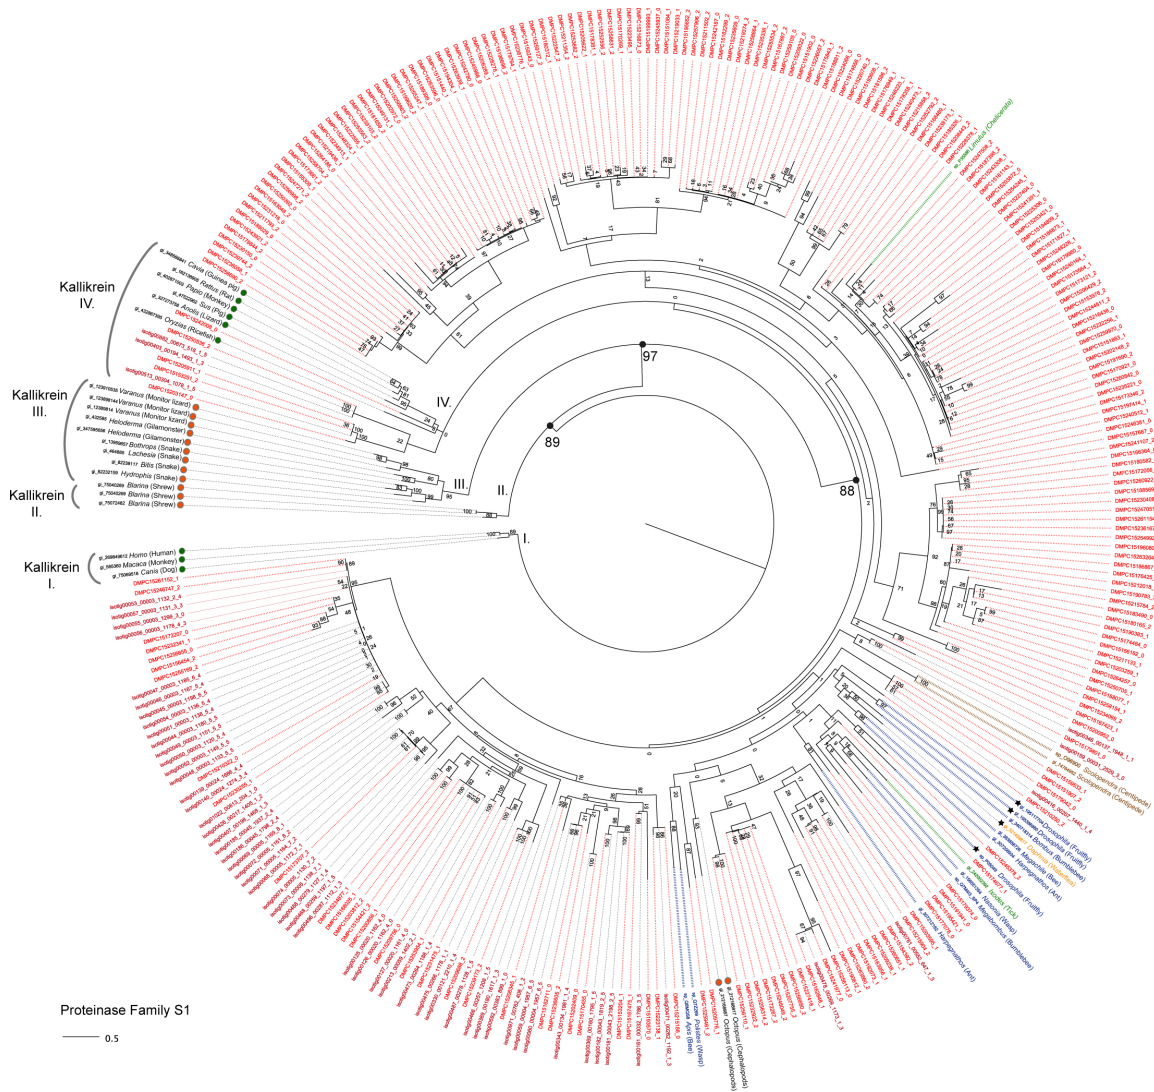

### Supplementary Figure 3b

Phylogenetic tree of peptidase S1 sequences. The tree was reconstructed with RaxML (Stamatakis and Alachiotis 2010), -f a, PROTGAMMAWAG, 1000 bootstraps.

Transcripts of the BVgT are coloured in light red, of the VgT by dark red, the remaining taxa are coloured as in previous figures. Kallikrein sequences are marked by green circles for non-venomous taxa, orange for venomous species. Nodes that separate the clades of kallikrein sequences are highlighted by black circles. The tree is rooted with sequence variants of non-venomous taxa.
