# Supplementary material for: The First Venomous Crustacean Revealed by Transcriptomics and Functional Morphology: Remipede Venom Glands Express a Unique Toxin Cocktail Dominated by Enzymes and a Neurotoxin
Source: PubMed Central journal article supplement — Mol Biol Evol. 2013 Oct 16;31(1):48–58. doi: 10.1093/molbev/mst199 (PMC3879455; doi:10.1093/molbev/mst199), 2013-10-16
Supplement: supp_mst199_13-0605_vonReumont_SupplementaryFile4.pdf [file supp_mst199_13-0605_vonReumont_SupplementaryFile4.pdf]

## Supplementary Material - file 4

**The first venomous crustacean revealed by transcriptomics and functional morphology: remipede venom glands express a unique toxin cocktail dominated by enzymes and a neurotoxin**

**Research Article**

**Björn M. von Reumont\*<sup>1</sup>, Alexander Blanke<sup>2</sup>, Sandy Richter<sup>3</sup>, Fernando Alvarez<sup>4</sup>,  
Christoph Bleidorn<sup>3</sup>, Ronald A Jenner\*<sup>1</sup>**

**The supplementary PDF files include:**

Supplementary\_file1: Supplementary Text, Supplementary Figures 1-2  
Supplementary\_file2: Supplementary Figures 3  
Supplementary\_file3: Supplementary Figures 4-6  
**Supplementary\_file4: Supplementary Figures 7-9**  
Supplementary\_file5: Supplementary Tables 1 and 2

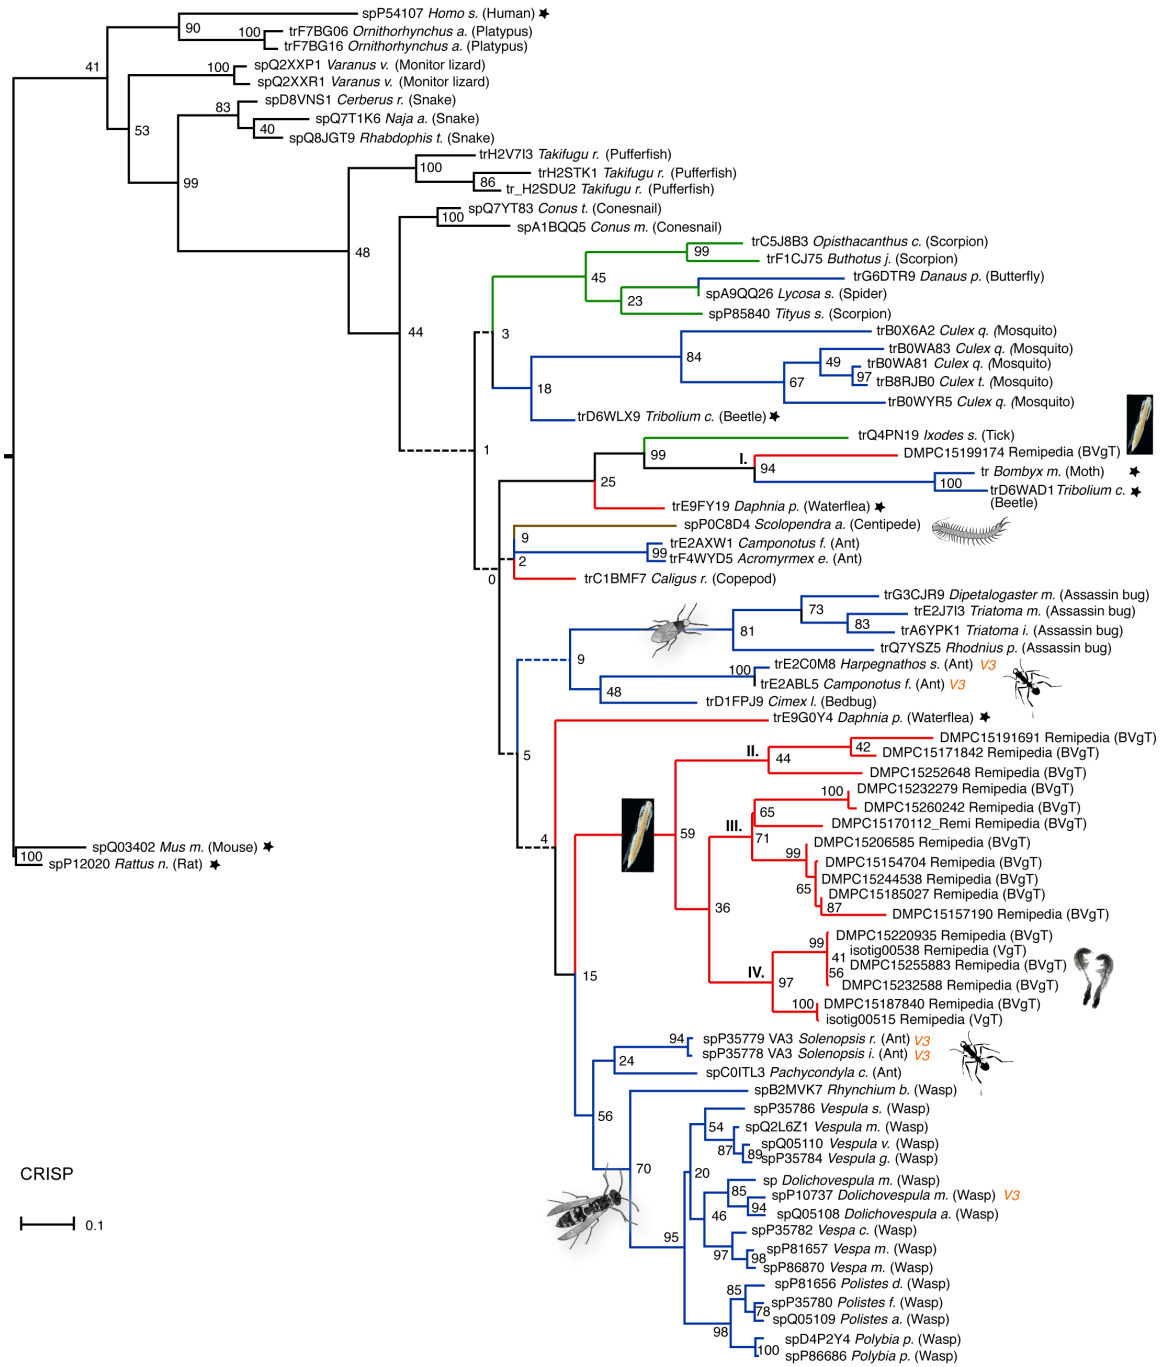

**Supplementary Figure 7a**

**Phylogenetic tree of the CRISP sequences.** The tree was reconstructed with RAxML (Stamatakis and Alachiotis 2010), -f a, PROTGAMMAIWAG, 10000 bootstraps. Sequences that were annotated in UniProt as venom allergen 3 sequences are labeled with V3. See previous figures for description.

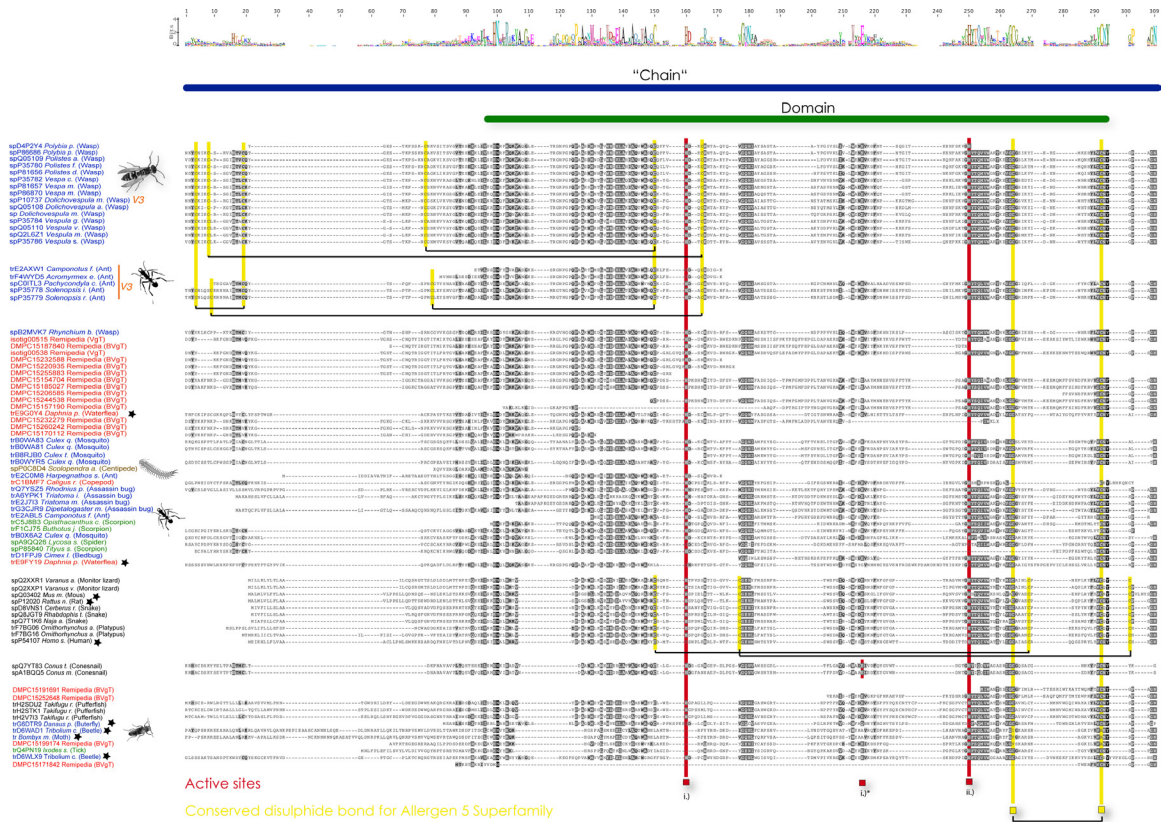

## Supplementary Figure 7b

**Alignment of the protein's chain region of the CRISP sequences.** The chain of the mature protein is indicated by a blue, the domain region by a green bar. Disulphide bonds are pictured with black lines, the cysteine residue backbone by yellow squares. Active sites are marked by red bars and squares. The active site i.)\* pictures the additional active site found in cone snail sequences. Sequences that were annotated in UniProt as venom allergen 3 sequences are labeled with V3.

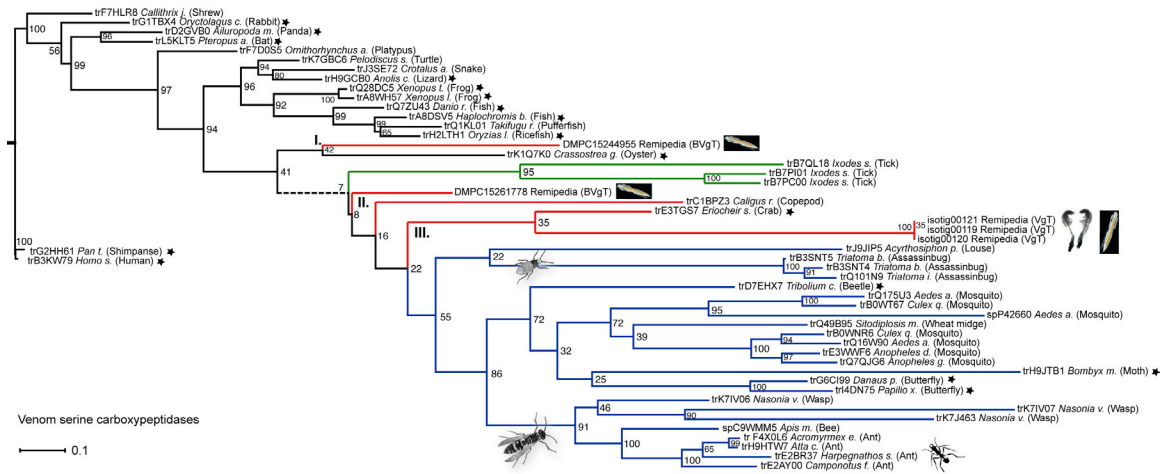

### Supplementary Figure 8

**Phylogenetic tree of the venom serine carboxypeptidase (VSC) sequences.** The tree was reconstructed with RAXML (Stamatakis and Alachiotis 2010), -f a, PROTGAMMAILG, 1000 bootstraps. See previous figures for description.

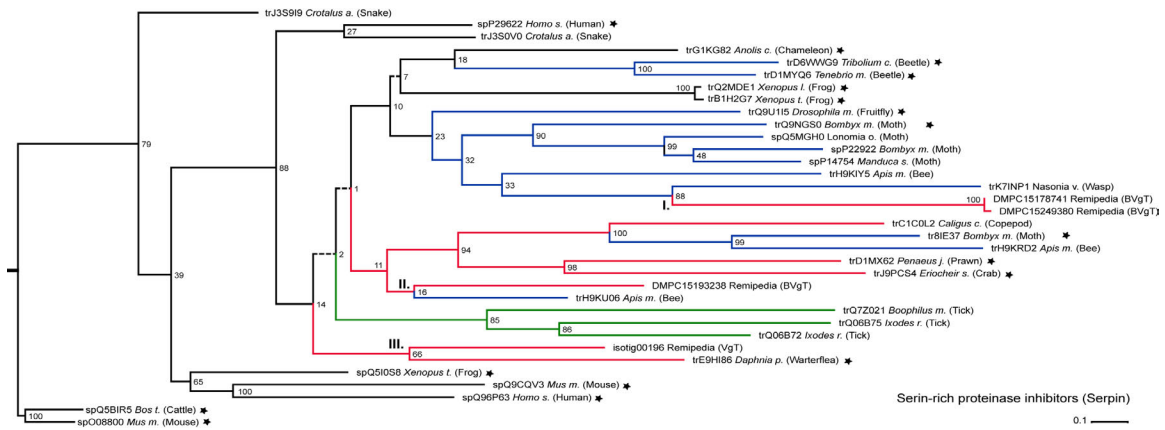

**Supplementary Figure 9a**

**Phylogenetic tree of the Serine-rich proteinase inhibitor (Serpin) sequences.** The tree was reconstructed with RAxML (Stamatakis and Alachiotis 2010), -f a, PROTGAMMAIFLG, 1000 bootstraps. See previous figures for description.

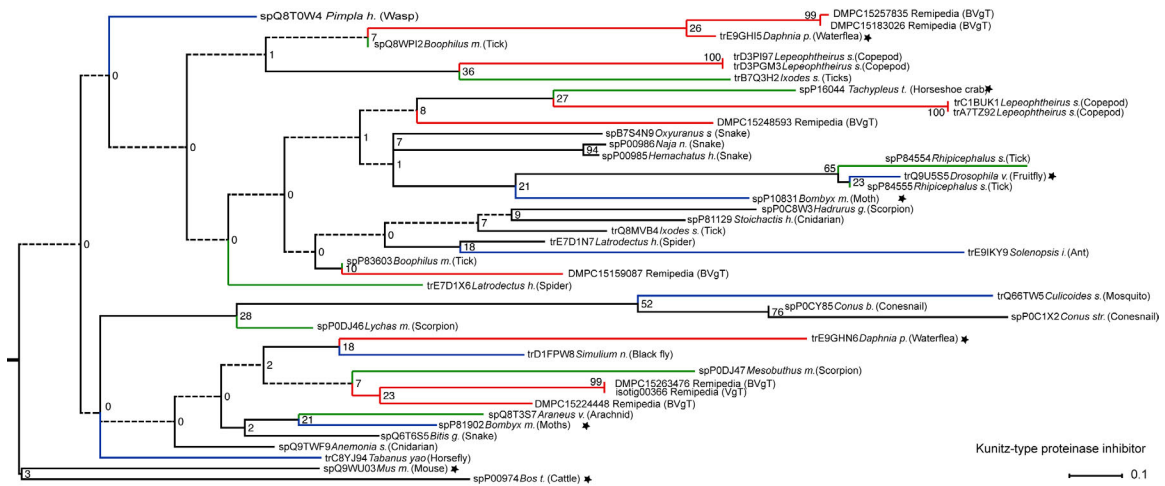

### Supplementary Figure 9b

**Phylogenetic tree of the Kunitz-type proteinase inhibitor sequences.** The tree was reconstructed with RAxML (Stamatakis and Alachiotis 2010), -f a, PROTGAMMAWAG, 10000 bootstraps. See previous figures for description.
